1           **An ALS Therapeutic Assembly Modulator Target in Peripheral Blood Mononuclear Cells:**  
2                           **Implications for ALS Pathophysiology, Therapeutics, and Diagnostics**

3  
4   Shao Feng Yu<sup>1</sup>, Maya Michon<sup>1</sup>, Anuradha F. Lingappa<sup>1</sup>, Kumar Paulvannan<sup>1</sup>, Dennis Solas<sup>1</sup>, Kim  
5   Staats<sup>2</sup>, Justin Ichida<sup>2</sup>, Debendranath Dey<sup>1</sup>, Jeffrey Rosenfeld<sup>3</sup> and Vishwanath R. Lingappa<sup>1,4,5</sup>

6  
7  
8  
9  
10  
11  
12  
13  
14  
15  
16  
17  
18  
19  
20  
21  
22

<sup>1</sup> Prosetta Biosciences, Inc. 670 5<sup>th</sup> St San Francisco, CA 94107

<sup>2</sup> University of Southern California, Los Angeles, CA 90033

<sup>3</sup> Loma Linda Medical Center, Loma Linda, CA 92354

<sup>4</sup> Department of Physiology, University of California, San Francisco, CA 94143

<sup>5</sup> To whom correspondence should be directed (vlingappa@prosetta.com)

23 **Abstract**

24 Assembly modulators are a new class of allosteric site-targeted therapeutic small molecules,  
25 some of which are effective at restoring nuclear localization of TDP-43 in ALS cellular models,  
26 and display efficacy in a variety of ALS animal models. One of these compounds has been shown  
27 to target a small subfraction of protein disulfide isomerase, a known allosteric modulator  
28 implicated in ALS pathophysiology, within a novel, transient, and energy-dependent multi-  
29 protein complex that includes other important members of the ALS interactome, such as TDP-  
30 43, RanGTPase, and selective autophagy receptor p62/SQSTM1. Building on earlier literature  
31 suggesting PBMC dysfunction in ALS, we demonstrate here that a similar multi-protein complex  
32 drug target is present in PBMCs with signature alterations in PBMCs from ALS patients  
33 compared to PBMCs from healthy individuals. ALS-associated changes in the drug target include  
34 increased RanGTPase and MMP9, diminished p62/SQSTM1, and most distinctively, appearance  
35 of a 17kDa post-translationally modified form of RanGTPase. Many of these changes are not  
36 readily apparent from analysis of whole cell extracts, as a number of the proteins present in the  
37 target multi-protein complex, including RanGTPase, comprise a miniscule percent of their total  
38 in cell extracts. A small subset of each of these proteins appear to come together in a transient,  
39 energy-dependent fashion, to form the drug target. Furthermore, whole blood from ALS  
40 patients shows a distinctive degradation of RanGTPase not observed in blood from healthy  
41 individuals, which appears to be rescued by treatment with either of two structurally unrelated  
42 ALS-active assembly modulators. Our findings are consistent with the hypothesis that ALS is  
43 fundamentally a disorder of homeostasis that can be both detected and treated by assembly  
44 modulators.

## 45 Introduction

46 Amyotrophic Lateral Sclerosis (ALS) is a devastating neurodegenerative disease that  
47 strikes approximately 6,000 American and 150,000 people worldwide annually<sup>1,2</sup>. Approximately  
48 10% of ALS is familial, with a large number of specific gene mutations implicated. The vast  
49 majority of ALS cases however, are sporadic, meaning that that there is no family history of the  
50 disease and therefore is likely due to an environmental or epigenetic influence. Specific  
51 environmental factors have been implicated in causing ALS, but remain controversial and  
52 inconclusive. While the pathophysiology is not well understood, aggregates of the protein TDP-  
53 43 are almost invariably found in the brains of patients with ALS and fronto-temporal dementia  
54 (FTD)<sup>3</sup>. This observation and the discovery of shared genetic mutation (C9orf72) suggest that  
55 these diseases are therefore on a continuum of the same underlying disorder. Despite these  
56 commonalities, the clinical presentation as well as progression of ALS, is highly variable<sup>4</sup>.

57  
58 With regards to TDP-43 pathophysiology, controversy exists as to the triggering event.  
59 Some studies have implicated mislocalization of TDP-43 from the nucleus in healthy cells to the  
60 cytoplasm, which is observed to variable degrees in fibroblasts from many, but not all, cases of  
61 ALS<sup>5</sup>. An alternative view is that, in response to stress, TDP-43 forms aggregates in the  
62 cytoplasm where it is synthesized, prior to transport to the nucleus<sup>6</sup>. A further controversy  
63 exists as to whether the relevant TDP-43 aggregates in the cytoplasm are within, or outside of,  
64 stress granules<sup>7</sup>. While the TDP-43 aggregates have generally been viewed as a trigger of motor  
65 neuron death, it is possible that they are an epiphenomenon whose elimination *per se* may not  
66 necessarily be therapeutic, by analogy to the failed attempts to remedy Alzheimer's Disease by

67 elimination of its pathognomonic A $\beta$  aggregates. Regardless of their natural history and role in  
68 the pathophysiology of ALS, the presence of TDP-43 aggregates are pathognomonic for the  
69 disease<sup>8,9</sup>.

70

71         Recently we presented our studies on the role of a newly appreciated dimension of gene  
72 expression, termed protein assembly, in pathophysiology of diverse diseases, including ALS<sup>10</sup>.  
73 We have identified several structurally unrelated small molecule chemotypes termed assembly  
74 modulators, that are strikingly efficacious, including at both preventing neurodegeneration and  
75 correcting TDP-43 pathology, in various cellular and animal models of ALS<sup>10</sup>. The compounds are  
76 broadly efficacious at reversing both TDP-43 mislocalization and stress-induced TDP-43  
77 aggregation, in both familial and sporadic ALS cellular models<sup>10</sup>. Efficacy was also demonstrated  
78 in various transgenic animals expressing human ALS-causing mutations including in TDP-43, FUS,  
79 c9orf72, and SOD1<sup>10</sup>. In view of this breadth of efficacy, we hypothesized the mechanism of  
80 action of the assembly modulator drug to target a step common to most, if not all, ALS. Analogs  
81 of some of these compounds are close to completion of a target product profile for initiation of  
82 investigational new drug (IND)-enabling studies in anticipation of human clinical trials in the  
83 near future.

84

85         The studies to be described here had several motivations. First, to explore the  
86 hypothesis that even physiological pathways thought of as well understood may have additional  
87 layers of regulation yet to be discovered, in which the small molecule assembly modulators and  
88 their novel multi-protein complex targets we have discovered, might be involved. How those

89 levels of control are integrated with one another and communicated from one organ system to  
90 others remains mysterious, for which the novel assembly modulator targets we have discovered  
91 are potential candidates. By corollary, what happens to other feedback controls when one level  
92 of regulation fails, remains to be determined. The argument has been made based on gene  
93 knockout experiments that back up pathway may be activated when primary regulatory controls  
94 fail<sup>11</sup>. Having a drug that impinges on a biochemical pathway in a novel way is a powerful means  
95 of probing biological regulation, particularly that which depends on information that does not  
96 reside simply in the sequence of the genome<sup>12,13,14</sup>. Thus the relevance of the compounds we  
97 have described, with their novel mechanism of action at allosteric sites<sup>15,16</sup>, and the  
98 unconventional nature of the targeted multi-protein complex (energy-dependent for formation,  
99 transient in existence, composed of miniscule subsets of the individual component proteins in  
100 the cell)<sup>17,18</sup>. These tools may provide a new understanding of the molecular basis for  
101 homeostasis.

102  
103 A second motivation for the present studies was to understand the meaning of the  
104 observed dysfunction of PBMCs in ALS<sup>19,20</sup>. These findings can be interpreted in two generally  
105 different ways. On the one hand, PBMC dysfunction might be due to ALS being a systemic  
106 disease whose most severe manifestation is motor neuron death, but which also manifests in  
107 less dramatic fashion in other organ systems, including in blood. Alternatively, dysfunction of  
108 PBMCs might be a consequence of disordered communication between organ systems, or its  
109 regulation. Thus, a disorder affecting one organ system could have a “domino effect” manifest in  
110 other organ systems. Even if ALS is initiated in motor neurons, their dysfunction may be

111 transmitted to other organ systems as a secondary consequence of feedback regulation  
112 intended to maintain homeostasis. In either framework, or hybrids of the two, disordered  
113 homeostasis is a fundamental feature of ALS pathophysiology. If a means of restoring  
114 homeostasis could be identified it may be effective in therapeutics of many diseases including  
115 ALS. Towards this end, we asked whether assembly modulator drugs, that are therapeutic in cell  
116 and animal models for ALS, might also detect a disordered drug target in PBMCs from ALS  
117 patients. If so, how does that target compare to the target observed in brain or patient-derived  
118 fibroblasts (PDFs) in which TDP-43 pathology is observed?

119

120 Finally, apart from intellectually interesting questions of feedback and mechanism of  
121 action, there is the practical desire to advance these compounds with remarkable therapeutic  
122 properties in cellular and animal models, to the clinic. Having a readily accessible signature in  
123 PBMCs could facilitate drug advancement in innumerable ways including for early detection of  
124 ALS (prior to severe disability), patient enrollment and tracking response to therapy. Most  
125 importantly, it could allow detection of ALS early when compounds that restore homeostasis  
126 should be most effective.

127

## 128 **Results**

129 Blinded blood samples were obtained from ALS patients under an IRB-approved  
130 protocol, PBMCs isolated, extracts prepared as described in methods, and analyzed for key  
131 proteins relevant to ALS. No clear and consistent different was observed in the protein pattern

132 between PBMCs of healthy and ALS patients by total protein silver stain (see for example, **Figure**  
133 **1A**).

134

135 However when PBMC extracts were applied to the ALS-active drug resin described  
136 previously<sup>10</sup> versus control resin (lacking the drug ligand), washed and bound material analyzed,  
137 a distinctive subset of proteins was observed, also largely shared between healthy individuals  
138 and ALS patients, but with a few possible differences (black arrows in **Figure 1B**).

139

**Figure 1**

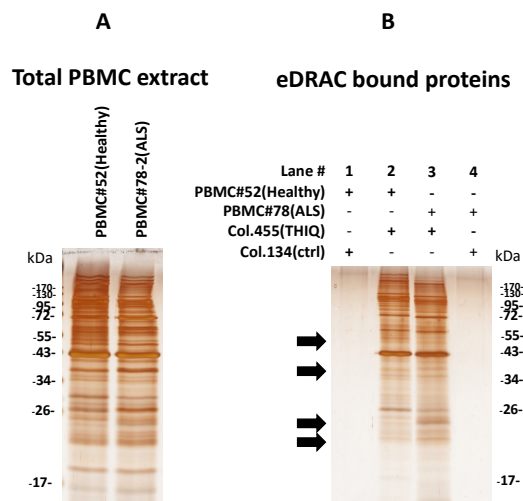

140

141 Legend to Figure 1. A. Silver stain of starting PBMC extract 10kxg/10min supernatant from a representative healthy  
142 individual (#52) and an ALS patient (#78-2). B. Silver stain of free drug eluate from ALS-active assembly modulator  
143 drug resin (column 455 THIQ) or control resin (column 134 lacking the drug ligand). Black arrows indicate positions  
144 at which healthy vs ALS patient samples show a suggestive difference in the free drug eluate protein pattern.

145

146 Mass spectrometry analysis of free drug eluates from PBMCs applied to the ALS-active drug  
147 resin (**Figure 2**) was carried out and compared to the pattern previous revealed from mouse

148 brain. A substantial proportion of tissue-specific proteins (~1/2 to 2/3 depending on the specific  
149 sample) were observed (see Supplemental Figure 1). Despite the high tissue specificity, a core  
150 set of 27 proteins were identified as shared between both PBMCs and brain, that are in the ALS  
151 interactome. Notably, this set included P4HB, a member of the PDI family, two known ALS-  
152 causing proteins (TUBA4A and VCP)<sup>21</sup>, along with five proteins implicated in the KEGG ALS  
153 interactome<sup>22</sup> (ATP5A1, HSPA5, TUBA1A, TUBA4A, and VCP). Furthermore, 24 of these 33  
154 proteins exhibited high-confidence interactions with known ALS-causing or disease-modifying  
155 proteins<sup>21</sup>. The 27 shared ALS interactome proteins also included multiple members of several  
156 protein families and complexes: two ATP synthase subunits (ATP5A1 and ATP6V1A), six  
157 chaperonins containing T-complex components (CCT2, CCT3, CCT4, CCT5, CCT7, and CCT8),  
158 three thioredoxin domain proteins (P4HB, PRDX1, and PRDX2), and four members of the 14-3-3  
159 family (YWHAB, YWHAЕ, YWHAH, and YWHAQ) (**Figure 2A**).

160

161 MCL clustering analysis was performed on the 33 shared proteins using the STRING  
162 database, which integrates information from various databases cataloging known and predicted  
163 protein-protein interactions. The analysis generated groups called “clusters,” characterized by a  
164 higher density of predicted associations within the clusters compared to those between  
165 clusters. Notably, 31 out of the 33 proteins formed a single, highly interconnected cluster,  
166 suggesting potential functional relationships between them. Two proteins, VAT1 and ALDH1A1,  
167 were excluded from this cluster, as there are no predicted interactions between these proteins  
168 and the other 31 proteins (**Figure 2B**).



Figure 2

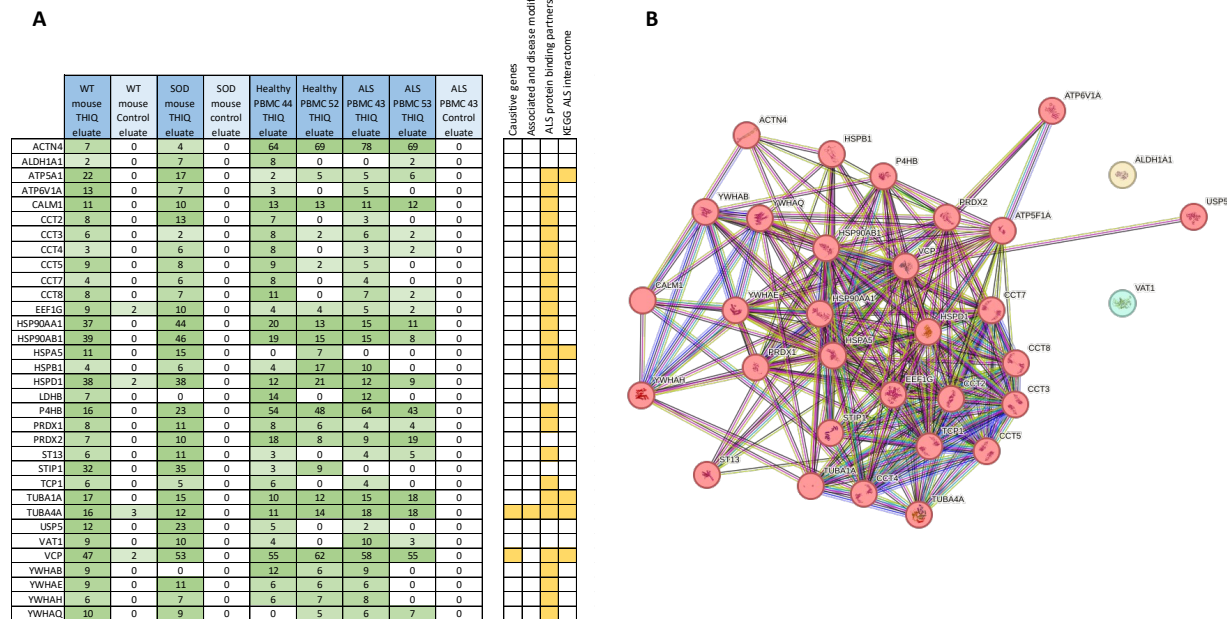

169

170

171 Legend to Figure 2. A. Spectral counts for proteins identified in THIQ drug resin eluate from mouse brain and

172 human PBMC extracts. Colors represent the number of spectral counts for a given protein in each sample, ranging

173 from light green (low counts) to dark green (high counts). The right panel indicates "hits" for proteins present in the

174 ALS interactome, where yellow is a hit. B. STRING database protein-protein interaction network with MCL

175 clustering. Each circle ("node") represents a protein, and each line ("edge") represents a predicted interaction

176 between two nodes. Different colors represent distinct clusters identified by the MCL algorithm, with red indicating

177 the largest cluster and yellow and green representing clusters containing only a single protein.

178

179 From the MS-MS analysis it was clear that the multi-protein complex isolated from

180 PBMCs on the ALS-active drug resin appears related to that observed in mouse brain, based on

181 the 27 shared proteins identified that are in the ALS protein interactome observed from both

182 sources. However no clear differences between healthy and ALS patients were observed by MS-

183 MS.

184

185 Recognizing that MS-MS can fail to identify specific proteins for a number of reasons,

186 including post-translational modification and failure of peptide ionization, we analyzed the

187 samples by western blot for particular proteins of interest including for TDP-43, RanGTPase, and

188 P62/SQSTM1 (Figure 3). By Western blotting a number of differences in proteins bound to the

189 assembly modulator THIQ drug resin were observed between healthy individuals and ALS

190 patient PBMC extracts. Most notably p62/SQSTM1 was greatly diminished and a 17kDa post-

191 translationally modified (PTM) fragment of RanGTPase detected in ALS patients compared to

192 healthy individuals.

Figure 3.

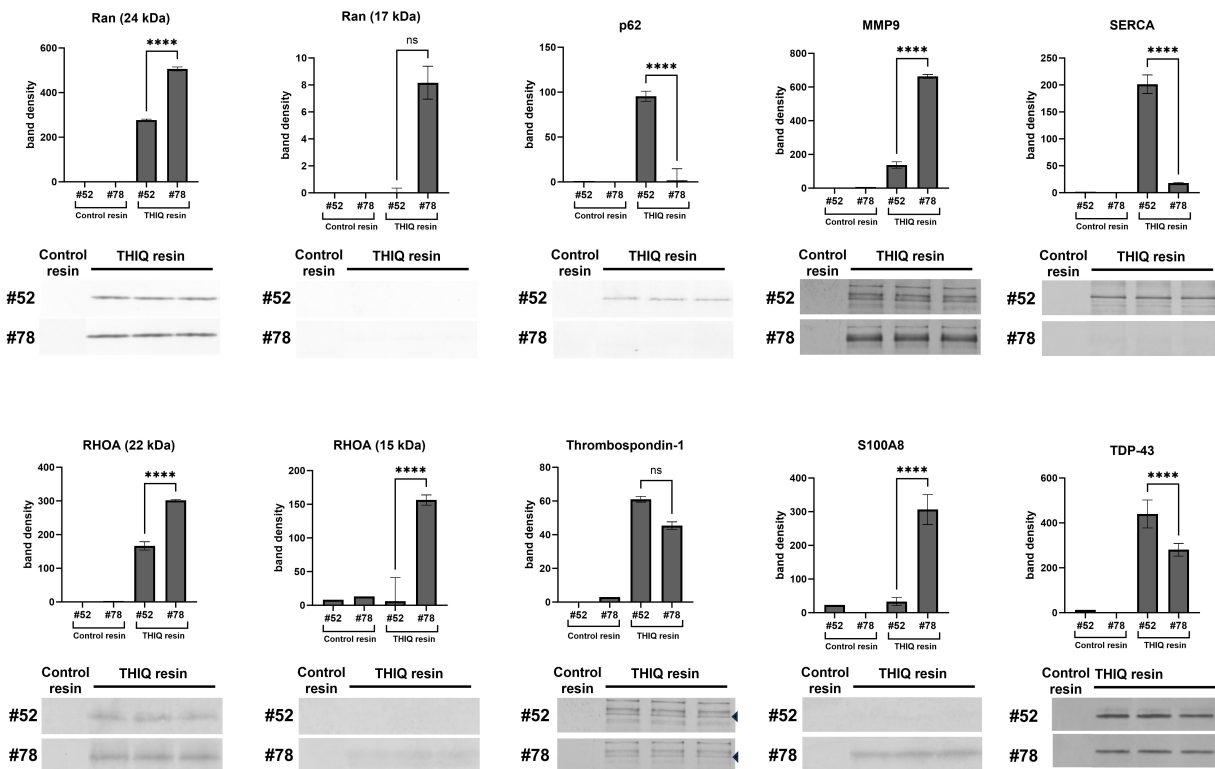

193

194 Legend to Figure 3. PBMC extracts were prepared as described in methods and applied to drug resin versus control  
195 resin, washed and bound proteins analyzed by SDS-PAGE transferred to 0.2u PVDF membrane and Western blotted  
196 for the indicated proteins with quantitation of bands using Image J software.

197

198 Next, photocrosslinking was carried out with PBMC extracts to which was added a drug  
199 analog in which the attachment to resin was replaced with a biotin and diazirine moiety such  
200 that exposure to UV light results in a covalent linkage to the drug binding protein(s). Under  
201 native conditions associated proteins can be precipitated with streptavidin beads. If the sample  
202 is first denatured, then only the direct drug-binding protein will be precipitated with  
203 streptavidin beads under the conditions described. Figure 4 demonstrates that PDI is the direct  
204 drug-binding protein. The PBMC extracts displayed striking similarities with the corresponding  
205 drug resin complexes from brain. In particular, the direct drug-binding protein in extracts from  
206 all three tissue sources, was PDI (Figure 4).

207

Figure 4.

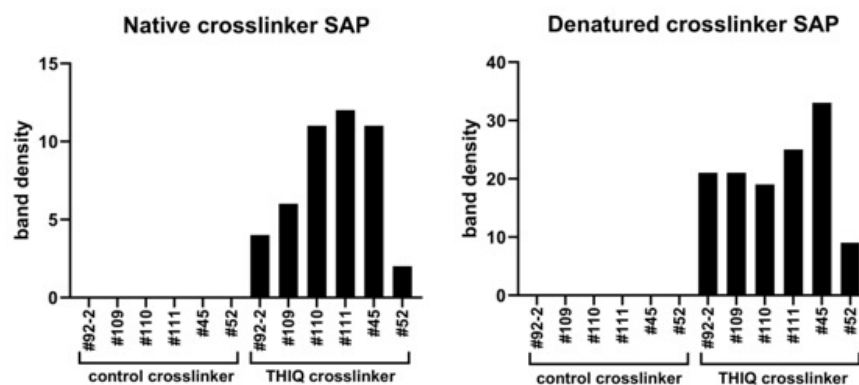

208

209 Legend to Figure 4. Quantitation of PDI in streptavidin precipitates under native vs denatured  
210 conditions after photocrosslinking with PAV-073 analog (THIQ) or control crosslinker lacking the

211 drug ligand. Both control and THIQ crosslinkers contain biotin and diazirine as described in  
212 methods and previously<sup>10</sup>.

213

214 We then assessed whether the ALS patient vs healthy control correlations were temporal  
215 in nature. As can be seen in Figure 5, with progression of disease, the amount of p62 bound to  
216 the resin diminishes and intensity of the RanGTPase 17kDa fragment increases, with disease  
217 progression. Notably, the diagnosis of ALS was made in pt 78 very early in her disease  
218 progression. She was able to drive herself to the clinic and walk in with a cane, at the time that  
219 the initial blood sample was taken.

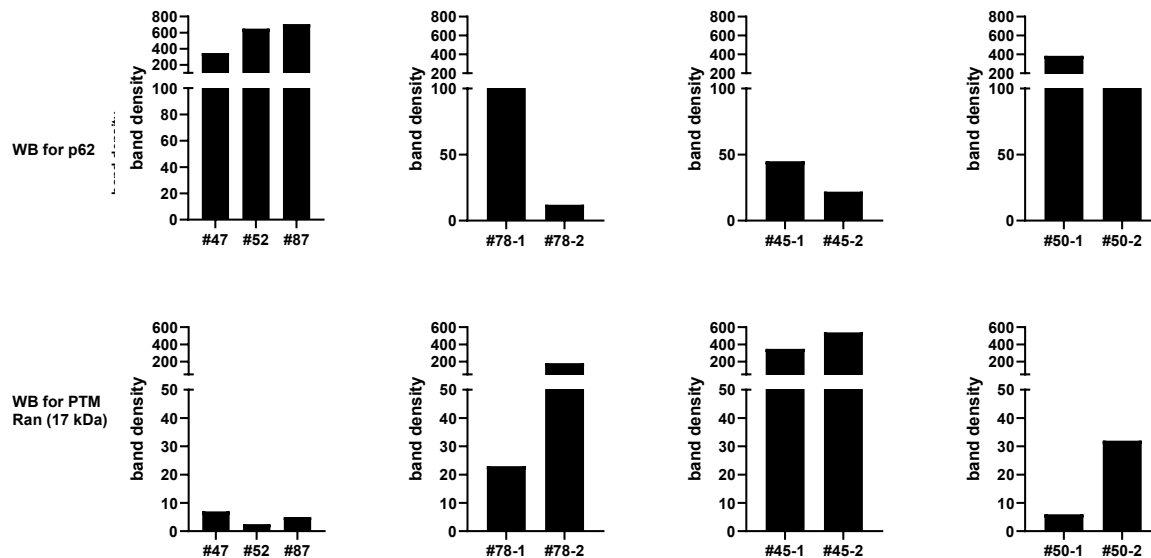

220

221 Legend to Figure 5. PBMC extracts were prepared as previously, applied to drug resins and bound proteins analyzed  
222 by Western blotting for specific proteins of interest. Bands corresponding to the correct molecular weights were  
223 quantified. The presence of an ALS-specific marker at an anomalous migration (17kDa) suggested the presence of a  
224 post-translational modification.

225

226 Out of 16 ALS patients and 5 healthy controls assessed in a blinded fashion, 11 ALS patients and  
227 0 healthy controls have the ALS-associated PBMC eDRAC eluate signatures noted, namely, loss  
228 of p62/SQSTM1 and appearance of the 17kDa RanGTPase fragment. Thus, taken together, the  
229 three eDRAC signatures observed appear to have a sensitivity exceeding 90% and a specificity  
230 approaching 100%, albeit from a modest sample size.

231

232 If, as we suggest, ALS represents a breakdown in homeostasis where protective mechanisms to  
233 reboot a cellular operating system are ineffective, certain predictions follow. For one, there may  
234 be a back up mechanism activated in an attempt to correct the failure of the first line of  
235 defense, although by definition in the subset of patients with ALS, that backup has failed to  
236 correct the problem. In view of the distinctive ALS-associated appearance of a 17kDa  
237 RanGTPase fragment as noted in Figure 5 above, degradation of RanGTPase, allowing its  
238 resynthesis seemed like a plausible feedback response that could be readily assessed. A second  
239 prediction is that if, as we hypothesize, assembly modulation is a fundamental mechanism of  
240 regulation of gene expression and its activation by these compounds is therapeutic for ALS,  
241 treatment of blood from ALS patients with the drugs should result in cessation of the back up  
242 RanGTPase degradation feedback loop, upon restoration of the primary mechanism of  
243 homeostatic control.

244

245 To test these hypotheses, we took blinded blood samples from ALS patients and healthy  
246 controls and treated whole blood with two different, structurally unrelated assembly modulator  
247 compounds versus vehicle control, and assess the impact after 72hrs of incubation (Figure 6). In

248 the healthy controls RanGTPase was observed to be stable. However in blood from ALS patients,  
 249 there were greatly diminished levels of RanGTPase after a brief incubation, consistent with what  
 250 would be expected for feedback degradation of dysfunctional RanGTPase (Figure 6A).  
 251 Upon treatment with either of two ALS assembly modulators for 72hrs, a striking restoration of  
 252 RanGTPase stability was observed, with no change in the level observed in healthy subjects.

Figure 6.

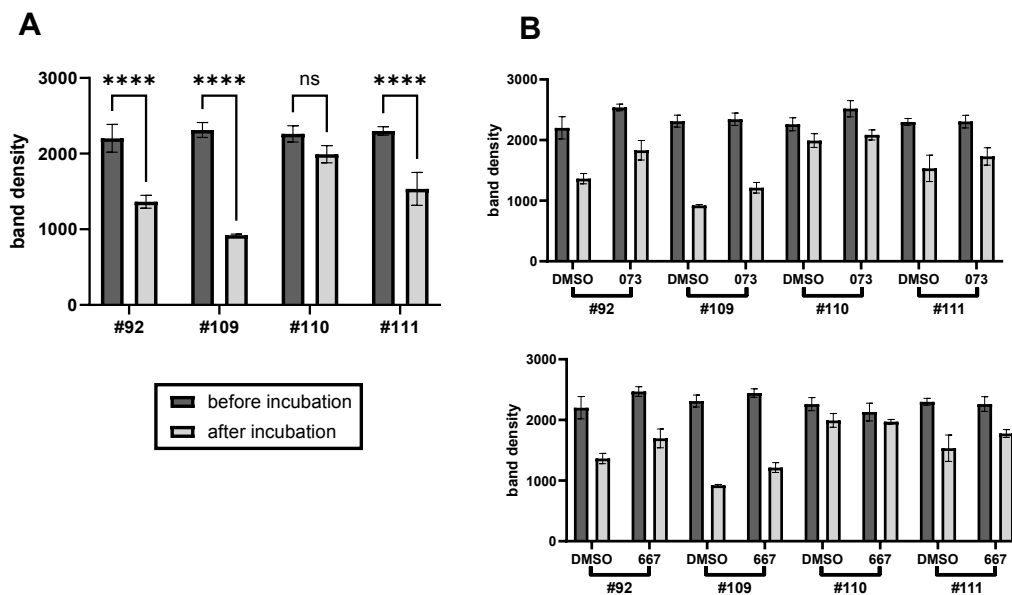

253

C

| Chemotype | Molecular weight (g/mol) | log P | H-bond donors | H-bond acceptors | Topological polar surface area (Å <sup>2</sup> ) | Tanimoto similarity coefficient |
|-----------|--------------------------|-------|---------------|------------------|--------------------------------------------------|---------------------------------|
| T         | 443.543                  | 4.8   | 1             | 5                | 49                                               | <20%                            |
| Q         | 441.915                  | 6.4   | 0             | 7                | 73.7                                             | <20%                            |

254

255 Legend to Figure 6. A. 10mls of whole blood from ALS patients or healthy controls was collected under an IRB-approved  
 256 protocol and shipped overnight at room temperature in EDTA-anticoagulated (purple top) tubes without any patient-specific  
 257 confidential information. An aliquot of whole blood was taken, incubated in 1% SDS for one hour at 37°C, prepared for SDS-  
 PAGE, and set aside. Another aliquot of whole blood was mixed 1:1 with glucose-supplemented MEM and incubated for  
 72hrs at 37oC in the presence of vehicle, at the end of which it was processed as previously described, and analyzed by SDS-  
 PAGE. (-) refers to the sample prepared for SDS-PAGE immediately, while (+) refers to the sample incubated prior to  
 preparation for SDS-PAGE. B. Samples of whole blood incubated for 72hr with two different assembly modulator drug  
 chemotypes (called T and Q) or vehicle (D) were incubated for 1hr at 37oC in 1% SDS and then analyzed by SDS-PAGE and  
 WB for RanGTPase. C. The two assembly modulator chemotypes studied in B. are compared for drug-like properties and  
 Tanimoto similarity coefficient compared to one another.

## 258 Discussion

259 The studies presented here demonstrate the presence, by the newly developed methods of  
260 energy-dependent ALS-active assembly modulator drug resin affinity chromatography and  
261 photocrosslinking, of a multi-protein complex in PBMCs that is related to the multi-protein  
262 complex observed by the same method in mouse brain and PDFs. As for the drug target in  
263 patient-derived fibroblasts (PDFs) where TDP-43 mislocalization and stress-induced aggregation  
264 is observed, and also for the target in mouse brain, the drug target in PBMCs has PDI as the  
265 direct drug-binding protein. The complex present in human PBMCs also shares with the target in  
266 mouse brain and PDFs the presence of RanGTPase, TDP-43, and other proteins, many of which  
267 are implicated in the ALS interactome (Figure 2). The precise role of this multi-protein complex  
268 drug target in ALS pathophysiology remains to be determined, but based on the efficacy of  
269 three structurally unrelated assembly modulators in various animal models, we hypothesize that  
270 the drug target serves a role in maintenance of homeostasis. The presence of p62 and  
271 optineurin in the complex in PBMCs from healthy individuals, and its loss in ALS patient PBMCs,  
272 exacerbated with disease progression (Figure 5), are consistent with this hypothesis.

273

274 Likewise, the appearance of a 17kDa post-translationally modified form of RanGTPase in the  
275 drug target isolated from ALS patient PBMCs (Figure 3) suggests a complex biology connected to  
276 TDP-43 mislocalization in view of the role of RanGTPase in nucleo-cytoplasmic transport.  
277 Moreover, these changes appear very early in ALS, detected in one case so analyzed, prior to  
278 onset of severe disability (Figure 4). In all three cases assessed, at a second later time point  
279 correlated to disease progression, both of these changes, namely loss of p62 and presence of

280 17kDa PTM RanGTPase, were exacerbated. Taken together with MMP9, which is also enriched  
281 in ALS patient PBMC eDRAC bound material, the three signatures identified had a sensitivity of  
282 95% and a specificity of 100% for distinguishing ALS patients from healthy individuals. Of course,  
283 larger numbers of cases will need to be assessed, but this early degree of discrimination, using  
284 as an affinity ligand a drug shown therapeutically active in animal models, is promising as a  
285 novel path to an ALS biomarker highly relevant to ALS therapeutics.

286

287 This target multi-protein complex is relevant to ALS for three reasons. First, the drug that served  
288 as the ligand to bind and isolate the target is therapeutic in a wide range of ALS cellular and  
289 animal models<sup>10</sup>. Second, the composition of the target multi-protein complex includes a  
290 number of proteins of the ALS interactome. Third, the isolated target from ALS patient PBMCs is  
291 altered in protein composition compared to that from healthy controls. Finally, separate from  
292 the specific target in PBMCs a profound degradation of RanGTPase is observed in whole blood  
293 from ALS patients but not healthy controls and is rescued upon 72hrs of treatment with ALS-  
294 active assembly modulators.

295

296 We interpret these findings to suggest that ALS is, fundamentally, a disease of disrupted  
297 homeostasis for which assembly modulators may be therapeutic. Just as the vast majority of  
298 individuals don't have cancer for most of their lives, but a small number will develop cancer due  
299 to failure of host defenses, so also host defenses protect most of us most of the time from the  
300 consequences of various central nervous system insults. A portion of that host defense includes  
301 restoration of homeostasis following resolution of a triggering insult. Sometimes however, those



302 host defenses appear to be incompletely efficacious. As a result, homeostasis is not restored  
303 and more and more severe backup mechanisms are engaged in a futile attempt to restore  
304 homeostasis. By analogy, when the operating system of your computer is frozen (with  
305 appearance of the “colored wheel of doom”), simply attempting to undo the key stroke that  
306 caused it will not be effective. Instead, it is necessary to reboot the operating system.  
307 Autophagy, in part mediated by p62/SQSTM1 and OPTN, are examples of such a reboot of the  
308 operating system for cells and organisms. But what happens when the reboot fails, e.g. due to  
309 loss of p62 from the dysfunctional target? We propose the consequence, in a range specific  
310 circumstances, is ALS. The persistent deviation from homeostasis is a stress to which motor  
311 neurons appear highly sensitive, and eventually, succumb. Once motor neurons have died, the  
312 disorder can be stabilized, but no longer fully reversed by restoring homeostasis. Hence the  
313 importance of early detection to enable early treatment, which the PBMC signatures noted may  
314 provide.

315  
316 The results of the whole blood experiments (Figure 6) are consistent with the hypothesis that  
317 the degradation of whole blood RanGTPase observed, is an extreme feedback response to the  
318 inability to restore the target complex back to the healthy state, where elevated RanGTPase and  
319 loss of p62 in the eDRAC eluate defined target are signatures of the dysfunctional state. Failure  
320 of more proximal feedback loops to correct that dysfunction are hypothesized to trigger a global  
321 degradation of RanGTPase in an extreme measure trying, unsuccessfully, to restore  
322 homeostasis. Treatment with either of two structurally unrelated assembly modulators results  
323 in correction of the RanGTPase degradation observed in whole blood, to a significant extent.

324 This suggests that a multi-step pathway with more than one potential target is involved. We  
325 hypothesize that treatment for a longer period would have completely restored RanGTPase  
326 levels to normal. Whether assembly modulator drug treatment serves to fully reboot the  
327 system, e.g. restore p62, remains to be determined and may vary on a case-by-case basis.  
328 Likewise, further studies are needed to determine whether periodic or ongoing drug treatment  
329 may be required. Regardless, drug-induced changes in target composition appear to result in  
330 restoration of homeostasis at least with respect to RanGTPase degradation. Whether this is  
331 reflective of concomitant changes in motor neurons that prevent further motor neuron loss  
332 remains to be investigated.

333

334 Our findings are significant for a number of reasons. First, these studies provide a novel window  
335 into regulatory feedback loops involved in cellular homeostasis. The precise relationship of the  
336 target multi-protein complex in healthy individuals vs ALS patients remains to be more fully  
337 understood. One hypothesis is that the target multi-protein complex in healthy individuals is the  
338 “normal” assembly machine involved in integration of diverse events of homeostasis. This  
339 includes TDP-43 localization, in which RanGTPase likely plays a critical role, perhaps along with  
340 C9orf72 and other ALS-implicated gene products. Other relevant pathways including autophagic  
341 removal of dysfunctional multi-protein complexes are naturally integrated into the physiological  
342 feedback pathways that collectively bring about homeostasis. ALS may be an example where a  
343 “stuck” pathway triggers more and more desperate feedback attempts to reboot the system  
344 without success, culminating in the mass degradation of RanGTPase observed in the whole  
345 blood experiment shown in Figure 5. In this model, the assembly modulator compounds serve

346 to reboot the cellular operating system. A future prediction to be tested, is that longer-term  
347 treatment of blood results in complete normalization of RanGTPase – and restoration of  
348 p62/SQSTM1 to the target complex present in PBMCs. By virtue of having therapeutic small  
349 molecules in hand, the pathways discovered are likely to be productively illuminated by e.g.  
350 including by fractionation and reconstitution of functional activities in extracts.

351

352 Second, these data, together with the studies shown previously, suggest that, despite the  
353 heterogeneity of ALS presentation and progression, a common underlying pathway is the source  
354 of the disease – and that assembly modulators are therapeutic at the underlying shared level.

355 While we hypothesize that restoration of autophagy is a crucial part of this pathway, re-  
356 establishment of homeostasis likely involves far more than just restoration of autophagy. In this  
357 regards the involvement of miniscule subsets of the specific gene products found together in  
358 the target multi-protein complex is notable. These targets could not have been detected by  
359 powerful molecular biological tools such as CRISPR or siRNA knockdown studies, because of the  
360 heterogeneous roles of small subsets of many, if not most, proteins. Thus the concept of protein  
361 “moonlighting” may be more pervasive than is currently generally recognized, and a level of  
362 organization of gene expression accessed by protein assembly modulation may be therapeutic  
363 for diverse diseases in ways not generally appreciated today.

364

365 Finally, it should be noted that many if not most patients come to medical attention long after  
366 the most effective period of treatment is lost. Drugs to stop the disease process may still be  
367 effective, but rely on maintenance of the underlying framework of feedback loops to restore

368 homeostasis, once disease progression is arrested. Sometimes however, those feedback loops  
369 fail and homeostasis is not restored, whether or not the primary disease process has been  
370 blocked. We hypothesize ALS is one such example, making it extremely difficult to treat. The  
371 methods described here provide a means of detecting ALS early, prior to onset of severe  
372 disability, when it is most treatable – and provide a potentially effective treatment in the form  
373 of the small molecule ligands themselves. It is notable that pt 78 came to medical attention  
374 early in her clinical course, prior to serious disability, and yet, the signature changes (lowered  
375 p62 and elevated RanGTPase 17kDa fragment) were observed, and sadly, progressed  
376 culminating in her death. To date, these findings have been observed in over a dozen ALS  
377 patients and are lacking in six of six healthy controls. If extended and demonstrated to be ALS-  
378 specific, they could enable rapid treatment. That PBMCs are a readily accessible tissue enables  
379 early diagnosis prior to motor neuron death, essential for optimal treatment of ALS.

380

## 381 **Methods**

### 382 **Preparation of PBMC extracts**

383 Whole blood collected in purple-top EDTA tubes from healthy individuals or ALS patients was  
384 shipped by overnight courier to the lab where it was diluted 1:1 with phosphate-buffered saline  
385 and layered on ficoll and centrifuged for 15 minutes at 3000 rpm at room temperature. PBMCs  
386 were collected at the interface, diluted with PBS 1:1 and centrifuged at 1000 rpm/15 minutes.  
387 The supernatant was aspirated and the pellet dissolved in p-body buffer (PBB) consisting of  
388 10mM Tris pH 7.5 ,10mM NaCl, 6mM MgAc, 1mM EDTA, and 0.35% Triton-X-100 and  
389 centrifuged at 4oC 10,000xg/10min.

### 390 **Drug Resin affinity chromatography**

391 Mouse brains from wildtype or SOD1 mutant animals were homogenized in cold phosphate  
392 buffered saline (PBS) (10mM sodium phosphate, 150 mM sodium chloride pH 7.4), then spun at  
393 1,000 rpm for 10 minutes until pelleted. The PBS was decanted and the pellet resuspended in a  
394 low salt buffer (10mM HEPES pH 7.6, 10mM NaCl, 1mM MgAc with 0.35% Tritonx100) then  
395 centrifuged at 10,000 rpm for 10 minutes at 4°C. The post-mitochondrial supernatant was  
396 removed and adjusted to a concentration of approximately 10 mg/ml and equilibrated in a  
397 physiologic column buffer (50 mM Hepes ph 7.6, 100 mM KAc, 6 mM MgAc, 1 mM EDTA, 4mM  
398 TGA). In some conditions, the extract was supplemented with an energy cocktail (to a final  
399 concentration of 1mM rATP, 1mM rGTP, 1mM rCTP, 1mM rUTP, and 5 ug/mL creatine kinase). 30  
400 ul or 230 ul of extract was then incubated for one hour at either 4° C or 22° C degrees on 30 ul  
401 of affigel resin coupled to THIQ compound or a 4% agarose matrix (control). The input material  
402 was collected and the resin was then washed with 3 ml column buffer. The resins were eluted  
403 for 2 hours then overnight at 22°C then 4°C in 100ul column buffer containing 100uM of the  
404 cognate compound. Eluates were run on western blot or sent for mass spectrometry for  
405 analysis.

406

### 407 **Chemical photocrosslinking**

408 Extract from mouse brain and PDFs grown in minimum essential media were prepared as above  
409 then adjusted to a protein concentration of approximately 3 mg/ml in column buffer containing  
410 0.01% triton. 1% DMSO or 100uM PAV-073 was added to 6ul of extract, then 3uM of PAV-073  
411 photocrosslinker or a negative control crosslinker (comprising of the biotin and diazirine

412 moieties without compound) were added. The extract was incubated for 20 minutes then  
413 exposed to UV at 365nm wavelength for 10 minutes then left on ice for one hour. After  
414 crosslinking, samples were divided in two 20 ul aliquots and one set was denatured by adding  
415 20 uL of column buffer 4ul of 10% SDS, 0.5 ul 1M dithiothreitol (DTT), and heating to 100°C for 5  
416 minutes. Both native and denatured aliquots were then diluted in 800 ul column buffer  
417 containing 0.1% triton. 5 ul of magnetic streptavidin beads (Pierce) were added to all samples  
418 and mixed for one hour at room temperature to capture all biotinylated proteins and co-  
419 associated proteins. Samples were placed on a magnetic rack to hold the beads in placed and  
420 washed three times with 800 ul of column buffer containing 0.1% triton. After washing, beads  
421 were resuspended in 80 ul of gel loading buffer containing SDS and analyzed by western blot or  
422 blot for affinity purified streptavidin. Samples were analyzed by western blot.

423

#### 424 **Western blotting**

425 SDS-PAGE gels were transferred in Towbin buffer (25mM Tris, 192mM glycine, 20% w/v  
426 methanol) to polyvinylidene fluoride membrane, blocked in 1% bovine serum albumin (BSA) in  
427 PBS, incubated overnight at 4°C in a 1:1,000 dilution of 100ug/mL affinity-purified primary IGG  
428 to PDI in 1% BSA in PBS containing 0.1% Tween-20 (PBST). Membranes were then washed twice  
429 in PBST and incubated for two hours at room temperature in a 1:5000 dilution of secondary  
430 anti-rabbit or anti-mouse antibody coupled to alkaline phosphatase in PBST. Membranes were  
431 washed two more times in PBST then incubated in a developer solution prepared from 100 uL of  
432 7.5 mg/mL 5-bromo-4-chloro-3-indolyl phosphate dissolved in 60% dimethyl formamide (DMF)  
433 in water and 100ul of 15 mg/ml nitro blue tetrazolium dissolved in 70% DMF in water, adjusted

434 to 50mL with 0.1 Tris (pH 9.5) and 0.1 mM magnesium chloride. Membranes were scanned and  
435 the integrated density of protein band was measured on ImageJ. Averages and the standard  
436 deviation between repeated experiments were calculated and plotted on Microsoft Excel.

437

#### 438 **Tandem mass spectrometry**

439 Samples were processed by SDS PAGE using a 10% Bis-tris NuPAGE gel with the 2-(N-  
440 morpholino)ethanesulfonic acid buffer system. The mobility region was excised and washed  
441 with 25 mM ammonium bicarbonate followed by 15mM acetonitrile. Samples were reduced  
442 with 10 mM dithiothreitol and 60° C followed by alkylation with 50 mM iodoacetamide at room  
443 temperature. Samples were then digested with trypsin (Promega) overnight (18 hours) at 37° C  
444 then quenched with formic acid and desalted using an Empore SD plate. Half of each digested  
445 sample was analyzed by LC-MS/MS with a Waters NanoAcquity HPLC system interfaced to a  
446 ThermoFisher Q Exactive. Peptides were loaded on a trapping column and eluted over a 75  $\mu$ M  
447 analytical column at 350 nL/min packed with Luna C18 resin (Phenomenex). The mass  
448 spectrometer was operated in a data dependent mode, with the Orbitrap operating at 60,000  
449 FWHM and 15,000 FWHM for MS and MS/MS respectively. The fifteen most abundant ions  
450 were selected for MS/MS.

451

452 Data was searched using a local copy of Mascot (Matrix Science) with the following parameters:  
453 Enzyme: Trypsin/P; Database: SwissProt Human (conducted forward and reverse plus common  
454 contaminants); Fixed modification: Carbamidomethyl (C) Variable modifications: Oxidation (M),  
455 Acetyl (N-term), Pyro-Glu (N-term Q), Deamidation (N/Q) Mass values: Monoisotopic; Peptide

456 Mass Tolerance: 10 ppm; Fragment Mass Tolerance: 0.02 Da; Max Missed Cleavages: 2. The data  
457 was analyzed by spectral count methods.

458

459 **Whole blood incubation and analysis.** 100ul aliquots of EDTA-anticoagulated whole blood is dispensed  
460 into 24 well plates containing 100ul of room temperature 80% PBS with 10mM glucose and then treated  
461 with DMSO to 0.01% or drug in DMSO to the same dilution with final concentration of 5uM drug. After  
462 72hrs samples are collected and aliquot 10ul into 1XLB as start material and aliquot another 10ul into  
463 1%SDS ECT(1mM rNTPs with 0.2ug/ml CK, 50mM Hepes pH 7.6 100mK KAc, 6mM MgAc and 4mM TGA)  
464 at total volume 100ul and incubate at 37°C for 1hr, then put samples into LB. Compared by SDS-PAGE  
465 and WB for RanGTPase with whole blood aliquot taken as start material.

466

#### 467 **References**

- 468 1. Al-Chalabi, A. & Hardiman, O. The epidemiology of ALS: a conspiracy of genes, environment  
469 and time. *Nat. Rev. Neurol.* **9**, 617–628 (2013).
- 470 2. Chiò, A. *et al.* Prognostic factors in ALS: A critical review. *Amyotroph. Lateral Scler. Off. Publ.*  
471 *World Fed. Neurol. Res. Group Mot. Neuron Dis.* **10**, 310–323 (2009).
- 472 3. Gandhi, J. *et al.* Protein misfolding and aggregation in neurodegenerative diseases: a review  
473 of pathogeneses, novel detection strategies, and potential therapeutics. *Rev. Neurosci.* **30**,  
474 339–358 (2019).
- 475 4. Grad, L. I., Rouleau, G. A., Ravits, J. & Cashman, N. R. Clinical Spectrum of Amyotrophic  
476 Lateral Sclerosis (ALS). *Cold Spring Harb. Perspect. Med.* **7**, (2017).
- 477 5. Chou, C.-C. *et al.* TDP-43 pathology disrupts nuclear pore complexes and nucleocytoplasmic  
478 transport in ALS/FTD. *Nat. Neurosci.* **21**, 228–239 (2018).



- 479 6. Baradaran-Heravi, Y., Van Broeckhoven, C. & van der Zee, J. Stress granule mediated protein  
480 aggregation and underlying gene defects in the FTD-ALS spectrum. *Neurobiol. Dis.* **134**,  
481 104639 (2020).
- 482 7. Gasset-Rosa, F. *et al.* Cytoplasmic TDP-43 De-mixing Independent of Stress Granules Drives  
483 Inhibition of Nuclear Import, Loss of Nuclear TDP-43, and Cell Death. *Neuron* **102**, 339-  
484 357.e7 (2019).
- 485 8. Aggad, D., Vérièpe, J., Tauffenberger, A. & Parker, J. A. TDP-43 toxicity proceeds via calcium  
486 dysregulation and necrosis in aging *Caenorhabditis elegans* motor neurons. *J. Neurosci. Off.*  
487 *J. Soc. Neurosci.* **34**, 12093–12103 (2014).
- 488 9. Buratti, E. & Baralle, F. E. Multiple roles of TDP-43 in gene expression, splicing regulation,  
489 and human disease. *Front. Biosci. J. Virtual Libr.* **13**, 867–878 (2008).
- 490 10. Feng Yu, S. *et al.* *Protein Assembly Modulation: A New Approach to ALS Therapeutics.*  
491 <http://biorxiv.org/lookup/doi/10.1101/2023.07.24.550252> (2023)  
492 doi:10.1101/2023.07.24.550252.
- 493 11. Marty, L. *et al.* The NADPH-dependent thioredoxin system constitutes a functional backup  
494 for cytosolic glutathione reductase in *Arabidopsis*. *Proc. Natl. Acad. Sci. U. S. A.* **106**, 9109–  
495 9114 (2009).
- 496 12. Noble, D. From Genes to Whole Organs: Connecting Biochemistry to Physiology. in *Novartis*  
497 *Foundation Symposia* (eds. Bock, G. R. & Goode, J. A.) vol. 239 111–128 (Wiley, 2001).
- 498 13. Tomkins, G. M. The metabolic code. *Science* **189**, 760–763 (1975).
- 499 14. Pardee, A. B. Regulatory Molecular Biology. *Cell Cycle* **5**, 846–852 (2006).

- 500 15. Pardee, A. B. & Reddy, G. P.-V. Beginnings of feedback inhibition, allostery, and multi-protein  
501 complexes. *Gene* **321**, 17–23 (2003).
- 502 16. Fenton, A. W. Allostery: an illustrated definition for the ‘second secret of life’. *Trends*  
503 *Biochem. Sci.* **33**, 420–425 (2008).
- 504 17. Müller-Schiffmann, A. *et al.* A Pan-Respiratory Antiviral Chemotype Targeting a Transient  
505 Host Multiprotein Complex. <http://biorxiv.org/lookup/doi/10.1101/2021.01.17.426875>  
506 (2021) doi:10.1101/2021.01.17.426875.
- 507 18. Lingappa, A. F. *et al.* Small Molecule Assembly Modulators with Pan-Cancer Therapeutic  
508 Efficacy. *bioRxiv* 2022.09.28.509937 (2022) doi:10.1101/2022.09.28.509937.
- 509 19. Nardo, G. *et al.* Amyotrophic lateral sclerosis multiprotein biomarkers in peripheral blood  
510 mononuclear cells. *PLoS One* **6**, e25545 (2011).
- 511 20. Luotti, S. *et al.* Diagnostic and prognostic values of PBMC proteins in amyotrophic lateral  
512 sclerosis. *Neurobiol. Dis.* **139**, 104815 (2020).
- 513 21. Dervishi, I. *et al.* Protein-protein interactions reveal key canonical pathways, upstream  
514 regulators, interactome domains, and novel targets in ALS. *Sci. Rep.* **8**, 14732 (2018).
- 515 22. Kanehisa, M., Furumichi, M., Sato, Y., Kawashima, M. & Ishiguro-Watanabe, M. KEGG for  
516 taxonomy-based analysis of pathways and genomes. *Nucleic Acids Res.* **51**, D587–D592  
517 (2023).

518

519

520

521

522 Supplemental Figure 1

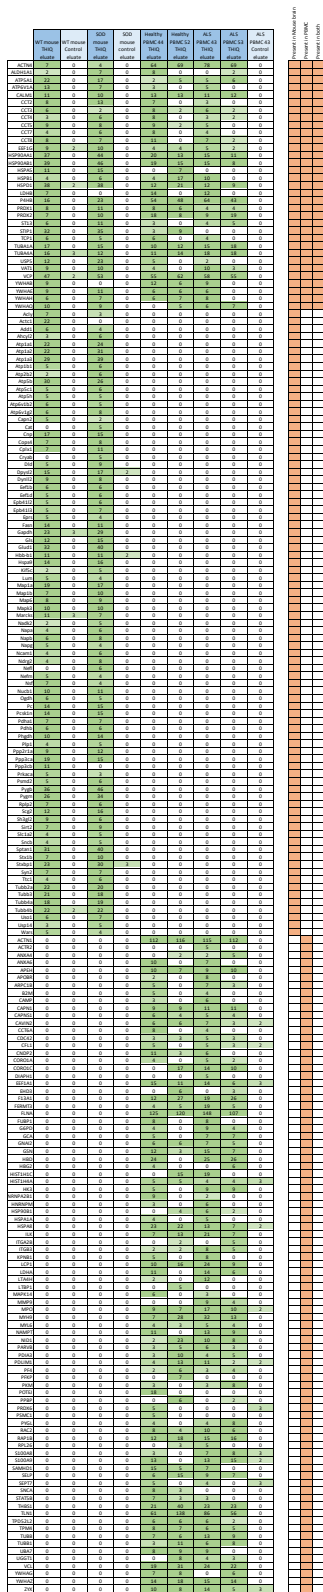

Legend to Supplemental Figure 1. Spectral counts for entire dataset of mouse brain and PBMC TH1Q eluates. Colors represent the number of spectral counts for a given protein in each sample, ranging from light green (low counts) to dark green (high counts). The right panel indicates whether a given protein was in one of both of the datasets, according to threshold values of >4 spectral counts in the drug eluate and <4 spectral counts in the control column eluate.

524 **Abbreviations**

525 ALS – Amyotrophic Lateral Sclerosis

526 CFPSA – Cell-free protein synthesis and assembly

527 CNS – Central Nervous System

528 DTT - dithiothreitol

529 DRAC – drug resin affinity chromatography

530 eDRAC – energy-dependent drug resin affinity chromatography

531 FTD – Fronto-Temporal Dementia

532 IND – investigational new drug

533 MS-MS – tandem mass spectrometry

534 PBMC – Peripheral blood mononuclear cell

535 PDF – patient-derived fibroblast

536 PDI – protein disulfide isomerase

537 PTM – post-translationally modified

538 SAP – streptavidin precipitation

539 SDS-PAGE – polyacrylamide gel electrophoresis in sodium dodecyl sulfate

540 WB – western blot

541

542 **Acknowledgments**

543 We thank Target ALS (grant# IL-2023-C4-L1), DOD CDMRP (grant #. W81XWH2210721), and Prosetta

544 Biosciences for financial support

545

546 **Competing Interests**

547 VRL is CEO of Prosetta Biosciences

548

549

550

551

552

553
